# Supplementary material for: Climate forcing and the California Current ecosystem
Source: Oxford University Press journal article supplement (doi:10.1093/icesjms/fsr009), 2011-03-15
Supplement: fsr009supp.doc [file fsr009supp.doc]

Table S1. Conceptual pathways linking physical features and productivity processes to Pacific sardine biology and population dynamics.

| Feature or process | Distribution range | Spawning timing behaviour | Spawn success and larval survival | Feeding and growth | Adult survival |
| --- | --- | --- | --- | --- | --- |
| Stratification |  |  | Concentrates prey for first feeding larvae, February-April in south, June/July in north | Increased stratification retains nutrients, plankton and prey in surface waters |  |
| Temperature | During warm years, northward range extensions in summer as far north as Alaska. | Optimum spawning window 14 (Canada)-16°C (California) | >14°C larval growth best (Feb-April in south; June/July in north);  <13°C larval development fails | Increased growth directly related to increased temperatures of all life stages |  |
| River discharge |  |  |  |  |  |
| Major currents | Stronger northward flowing currents in spring augment northward migration |  |  |  |  |
| Eddies and meanders |  | Sardines spawn in highly productive areas with concentrated food, such as the fronts of eddies and meanders | More eddies produce a greater front area, leading to larger foraging area and more encounters | Concentrate plankton prey for larval and early juvenile stages |  |
| Upwelling |  |  |  | Upwelling areas are nutrient rich, leading to high productivity thus supporting growth |  |
| Bloom timing, duration and intensity | Summer feeding and northward migration matches availability of bloom | Sardines tend to spawn in highly productive areas | Larval success linked to first bloom and foraging window (Feb-April south, June-July north) |  |  |

Table S2. Conceptual pathways linking physical features and productivity processes to Dover sole biology and population dynamics.

| Feature or process | Distribution range | Spawning behaviour | Spawn success and larval survival | Feeding and growth | Adult survival |
| --- | --- | --- | --- | --- | --- |
| Stratification | Dover use oxygen minimum zones, which may be more or less available under alternate stratification regimes |  |  |  | Dover use oxygen minimum zones, which may be more or less available under alternate stratification regimes |
| Temperature | Warmer water could push them into deeper water or farther north |  |  | Negative correlation between temperature and growth rate |  |
| River discharge |  |  |  |  |  |
| Major currents |  | Dover sole batch spawn in deep water, and some batches may be lost if currents are unfavourable | Prolonged pelagic larval phase (6-24 months) makes them susceptible to changes in large-scale oceanography |  |  |
| Eddies and meanders |  |  | Prolonged pelagic larval phase (6-24 months) makes them susceptible to changes in meso-scale oceanography |  |  |
| Upwelling | Dover use oxygen minimum zones, which may be more or less available under alternate upwelling regimes |  | Late winter onshore Ekman transport associated with settlement success | Weak positive relationship between upwelling indexes and growth | Dover use oxygen minimum zones, which may be more or less available under alternate upwelling regimes |
| Bloom timing, duration and intensity | Dover use oxygen minimum zones, which may be more or less available under alternate productivity regimes |  | Duration and intensity important due to prolonged pelagic larval phase |  | Dover use oxygen minimum zones, which may be more or less available under alternate productivity regimes |

Table S3. Conceptual pathways linking physical features and productivity processes to blue shark biology and population dynamics.

| Feature or process | Distribution range | Spawning behaviour | Spawn success and larval survival | Feeding and growth | Adult survival |
| --- | --- | --- | --- | --- | --- |
| Stratification |  |  |  |  |  |
| Temperature | Pelagic sharks in the Pacific typically prefer temperatures between 12-21 °C. The majority in northeastern Pacific waters captured between 16-20°C. |  |  |  |  |
| River discharge |  |  |  |  |  |
| Major currents |  |  |  |  |  |
| Eddies and meanders |  |  |  |  |  |
| Upwelling |  |  |  |  |  |
| Bloom timing, duration and intensity |  |  |  |  |  |

Table S4. Conceptual pathways linking physical features and productivity processes to chinook salmon biology and population dynamics.

| Feature or process | Distribution range | Spawning behaviour | Spawn success and larval survival | Feeding and growth | Adult survival |
| --- | --- | --- | --- | --- | --- |
| Stratification |  |  |  | Increased stratification (linked to river discharge) leads to increased nutrients, plankton and prey retention in marine surface waters |  |
| Temperature | High river and lake temperatures may shift spawning and freshwater range northward. High ocean temperatures may shift adult range northward. |  | High river temperatures increased egg, alevin, and fry mortality. Extreme high river temperatures associated with pre-spawning adult mortality. | Growth increases with temperature | Predator distributions affected by temperature. Extreme high river temperatures associated with pre-spawning adult mortality. |
| River discharge |  |  | Upstream spawning migration linked to river flows. Low river discharge in winter leads to desiccation of redds. Extreme discharge events scour redds or flush fry downstream. Low snowpack reduces flows in summer and fall, leading to juvenile mortality. | Increased river discharge leading to increased stability, increased land-derived nutrients loads, and increased productivity on the continental shelf is important for smolts during first marine summer. |  |
| Major currents |  |  | Strong California Current favours growth of some populations; growth correlated to fecundity | Strong California Current favours growth of some populations | Strong California Current favours growth of some populations; growth correlated to survival |
| Eddies and meanders |  |  |  |  |  |
| Upwelling |  |  |  |  |  |
| Bloom timing, duration and intensity |  |  |  |  |  |

Table S5. Conceptual pathways linking physical features and productivity processes to Pacific hake biology and population dynamics.

| Feature or process | Distribution range | Spawning behaviour | Spawn success and larval survival | Feeding and growth | Adult survival |
| --- | --- | --- | --- | --- | --- |
| Stratification |  |  |  |  |  |
| Temperature | Summer feeding (May-Oct) range extends northward into Canadian waters with warm waters | Hake expand spawning range northward in warmer years | Northern migrations of adults are limited in cool years, with higher spatial overlap of adults and juveniles resulting in higher cannibalism | Warm water coupled with weaker upwelling, lowers nutrient enrichment, which decreases zooplankton productivity |  |
| River discharge |  |  |  |  |  |
| Major currents | Increased Davidson Current northward aids northern feeding migration |  |  | North region: the shelf break current concentrates euphausiids where Pacific hake feed |  |
| Eddies and meanders |  |  | Eddies and meanders retain prey; increased availability improves larval survival |  |  |
| Upwelling |  |  | Reduced upwelling and offshore advection favour larval survival | Upwelling concentrates euphausiids at shelf break front; weaker upwelling lowers nutrient enrichment, which decreases zooplankton productivity |  |
| Bloom timing, duration and intensity |  |  | Individuals need to match first feeding to beginning of bloom |  |  |
